# Supplementary material for: Becoming Safe, Legal, Mature, Moderate, and Self-Reflexive: Trajectories of Drinking and Abstinence among Young People
Source: MDPI journal article supplement (doi:10.3390/ijerph19063591), 2022-03-17
Supplement: s1 [file s1]

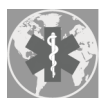

## Supplementary Material 1. Table of participants

**Table S1.** Descriptives of participants

|                                           | N  | %    |
|-------------------------------------------|----|------|
| Gender                                    |    |      |
| Women                                     | 19 | 68   |
| Men                                       | 9  | 32   |
| Age groups at Wave 1                      |    |      |
| 15–17                                     | 12 | 43   |
| 18–19                                     | 16 | 57   |
| Background                                |    |      |
| Born in Sweden                            | 19 | 68   |
| Parents born abroad                       | 7  | 25   |
| Born abroad                               | 2  | 7    |
| Social class <sup>a</sup>                 |    |      |
| Lower                                     | 9  | 32   |
| Middle                                    | 11 | 39   |
| Higher                                    | 8  | 29   |
| Area <sup>b</sup>                         |    |      |
| Large city                                | 2  | 7    |
| Medium-sized town                         | 13 | 46,5 |
| Small town                                | 13 | 46,5 |
| Socioeconomic status of area <sup>c</sup> |    |      |
| Low status                                | 11 | 39   |
| Middle                                    | 9  | 32   |
| High status                               | 8  | 29   |
| Total                                     | 28 | 100  |

<sup>a</sup> Based on categorisation of parents' occupations.

<sup>b</sup> Based on number of inhabitants in the municipality of residence. Large city  $\geq 500,000$ , Middle town 50,000–499,999, Small town  $< 50,000$ .

<sup>c</sup> Based on categorisation of share of adult population with longstanding social welfare, average income of population, and ill-health rate of the municipality of residence.

## **Supplementary Material 2. Thematic semi-structured interview guide: Why are young people drinking less than earlier?**

Theme 1. Information about the study and informed consent to participate

Theme 2. Background information: age, living situation, studies/work, family situation, pastime activities

Theme 3. Relationship to alcohol

If drinker: Description of settings, situations, frequency, amount, beverages of preference, activities, company

If non-drinker: Description of pastime activities, settings, situations, company

Theme 4. Friends', parents' and siblings' alcohol practices, attitudes and supervision

Theme 5. A typical occasion of having fun (with or without alcohol)

Theme 6. Alcohol in relation to a) friendship, b) romantic relationships, c) health and well-being

Theme 7. Alcohol and gender norms

Theme 8. Alcohol and/or a) sports and exercise, b) use of social media, c) gaming, d) gambling, e) tobacco, f) drug use

Theme 9. Motives for drinking or non-drinking

*In wave 2 and 3, follow-up questions were asked concerning changes in life situation (studies, work, change of residence etc.) and approaches to alcohol, based on the same themes and previous interview answers*

## Supplementary Material 3. Figure S1 of trajectories, actants and chains of translations

| Trajectory                                                                                          | Social, emotional and material actants                                                                                                                                                                                                                                                                                            | Chain of translation                                                                  |
|-----------------------------------------------------------------------------------------------------|-----------------------------------------------------------------------------------------------------------------------------------------------------------------------------------------------------------------------------------------------------------------------------------------------------------------------------------|---------------------------------------------------------------------------------------|
| Drinking becomes translated from unsafe to safe assemblages                                         | <b>Main actant: Drinking place</b><br><u>Unsafe assemblage</u> : private home parties, underaged drinking, lack of control, vulnerability, illegal alcohol; <i>alcohol central</i><br><u>Safe assemblage</u> : public drinking venues, legal age drinking, control, absence of risk, regulated alcohol; <i>alcohol peripheral</i> | Increasing alcohol consumption                                                        |
| Drinking becomes translated from illegal to legal assemblages                                       | <b>Main actant: Age limit</b><br><u>Illegal drinking assemblage</u> : underage, minor, no rights, immaturity, abstinence<br><u>Legal drinking assemblage</u> : adult, rights, maturity, access, trust from parents, moderate drinking as a natural step towards becoming an adult                                                 | Increasing alcohol consumption                                                        |
| High-performing assemblages exclude drinking or becomes translated to include drinking for pleasure | <b>Main actant: Performance</b><br><u>High-performing assemblage</u> : self-control, responsibility, expectations, success, high grades, elite sports, abstinence<br><u>Assemblage of pleasure</u> : having fun, well-being, enjoyment, socialising, moderate drinking                                                            | Maintained abstinence or increasing alcohol consumption (from abstinence to moderate) |
| Heavy drinking becomes translated from immature to mature assemblages                               | <b>Main actant: Intoxication</b><br><u>Immature assemblage</u> : partying as “mandatory”, drinking heavily, unhealthily and irresponsibly part of being young<br><u>Mature assemblage</u> : controlled and moderate drinking, diverse options, staying home is acceptable, health concerns, awareness of risks, cautiousness      | Decreasing alcohol consumption                                                        |
| Abstention is translated from authoritative assemblages to self-reflexive assemblages               | <b>Main actant: Abstinence</b><br><u>Authoritative assemblage</u> : religious beliefs, parental rules, subcultural norms, temperance or political values<br><u>Self-reflexive assemblage</u> : personal reasons based on authentic individual experiences and choices                                                             | Maintained abstinence                                                                 |
